# Supplementary material for: Anemia prevalence and associated factors in patients with HIV at Ethiopian Hospitals
Source: Research Square preprint supplement (doi:10.21203/rs.3.rs-6912450/v1), 2025-07-14
Supplement: Supplementary file 1 [file 114f3c86c42d5e86907869a5.pdf]

# Anemia in PLHIV

## Demographic Factors

### Medical Record Number(MRN)

*a six digit number of the card*

---

### Age

*answer in years*

---

### Sex

- ☐ Male
- ☐ Female

### Marital Status

- ☐ Never Married
- ☐ Married
- ☐ Divorced
- ☐ Widowed

### Religion

- ☐ Orthodox
- ☐ Muslim
- ☐ Protestant
- ☐ Catholic
- ☐ Other

### Level of Education

- ☐ No education
- ☐ Primary
- ☐ Secondary
- ☐ Tertiary
- ☐ Other

### Occupation

*write down the occupation*

---

**Residence/Adress**

*If the patient lives in region/zone adminstartion city- Urban, the rest-rural*

- ☐ Urban
- ☐ Rural

**Clinical Parameters**

**What is the duration of ART of the patient?**

*in months*

---

**What is the BMI of the patient?**

- ☐ 1. Normal(18.5-24.99)
- ☐ 2. Mild(17-18.49)
- ☐ 3.Moderate(16-16.99)
- ☐ 4. Severe(<16)
- ☐ 5. Overweight(25-29.99)

**what is the functional status of the patient?**

- ☐ Working
- ☐ Ambulatory
- ☐ Bed ridden

**What is the WHO clinical stage of the patient?**

- ☐ Stage-1
- ☐ Stage-2
- ☐ Stage-3
- ☐ Stage-4

**Are/is there an opportunistic infections/cancers at this time?**

- ☐ Yes
- ☐ No

**If yes, What is the opportunistic infection?**

---

**What is the level of ART adherence of the patient?**

- ☐ Good
- ☐ Fair
- ☐ Poor

## Labs

**What is the CD4 of the patient?**

*/mm<sup>3</sup>*

---

**What is the viral load of the patient?**

*copies/ml*

---

**What is the hemoglobin of the patient?**

*g/dL*

---

**If Anemic, What is the MCV of the patient?**

*Hb<13, for Male & <12 for female*

---

**Does the patient have leukopenia(WBC<4500)?**

*WBC count at the top of CBC*

☐ Yes

☐ no

**Does the patient have thrombocytopenia(PLT<150,000)?**

☐ Yes

☐ No

**Does the patient have impaired LFT?**

☐ Yes

☐ No

**Does the patient have Renal impairment?**

☐ Yes

☐ No

## Medications

**What is the type of the HAART regimen of the patient?**

☐ AZT based

☐ Non AZT based

**Does the patient take Cotrimoxazole preventive therapy at this time?**

☐ Yes

☐ No

**Does the patient have Isoniazid preventive therapyat this time?**

☐ Yes

☐ No
